# Supplementary material for: Challenges and opportunities in scaling climate-resilient housing solutions
Source: Research Square preprint supplement (doi:10.21203/rs.3.rs-6322825/v1), 2025-05-05
Supplement: Supplementary file 1 [file 8b7c2b24aa4f5c5c223f2681.docx]

Supplemental Materials

**SM 1: Challenges in U.S. housing market by sector.** The housing challenges identified by participants are visualized, with indication of the different employment sectors of the participants specifying each challenge.


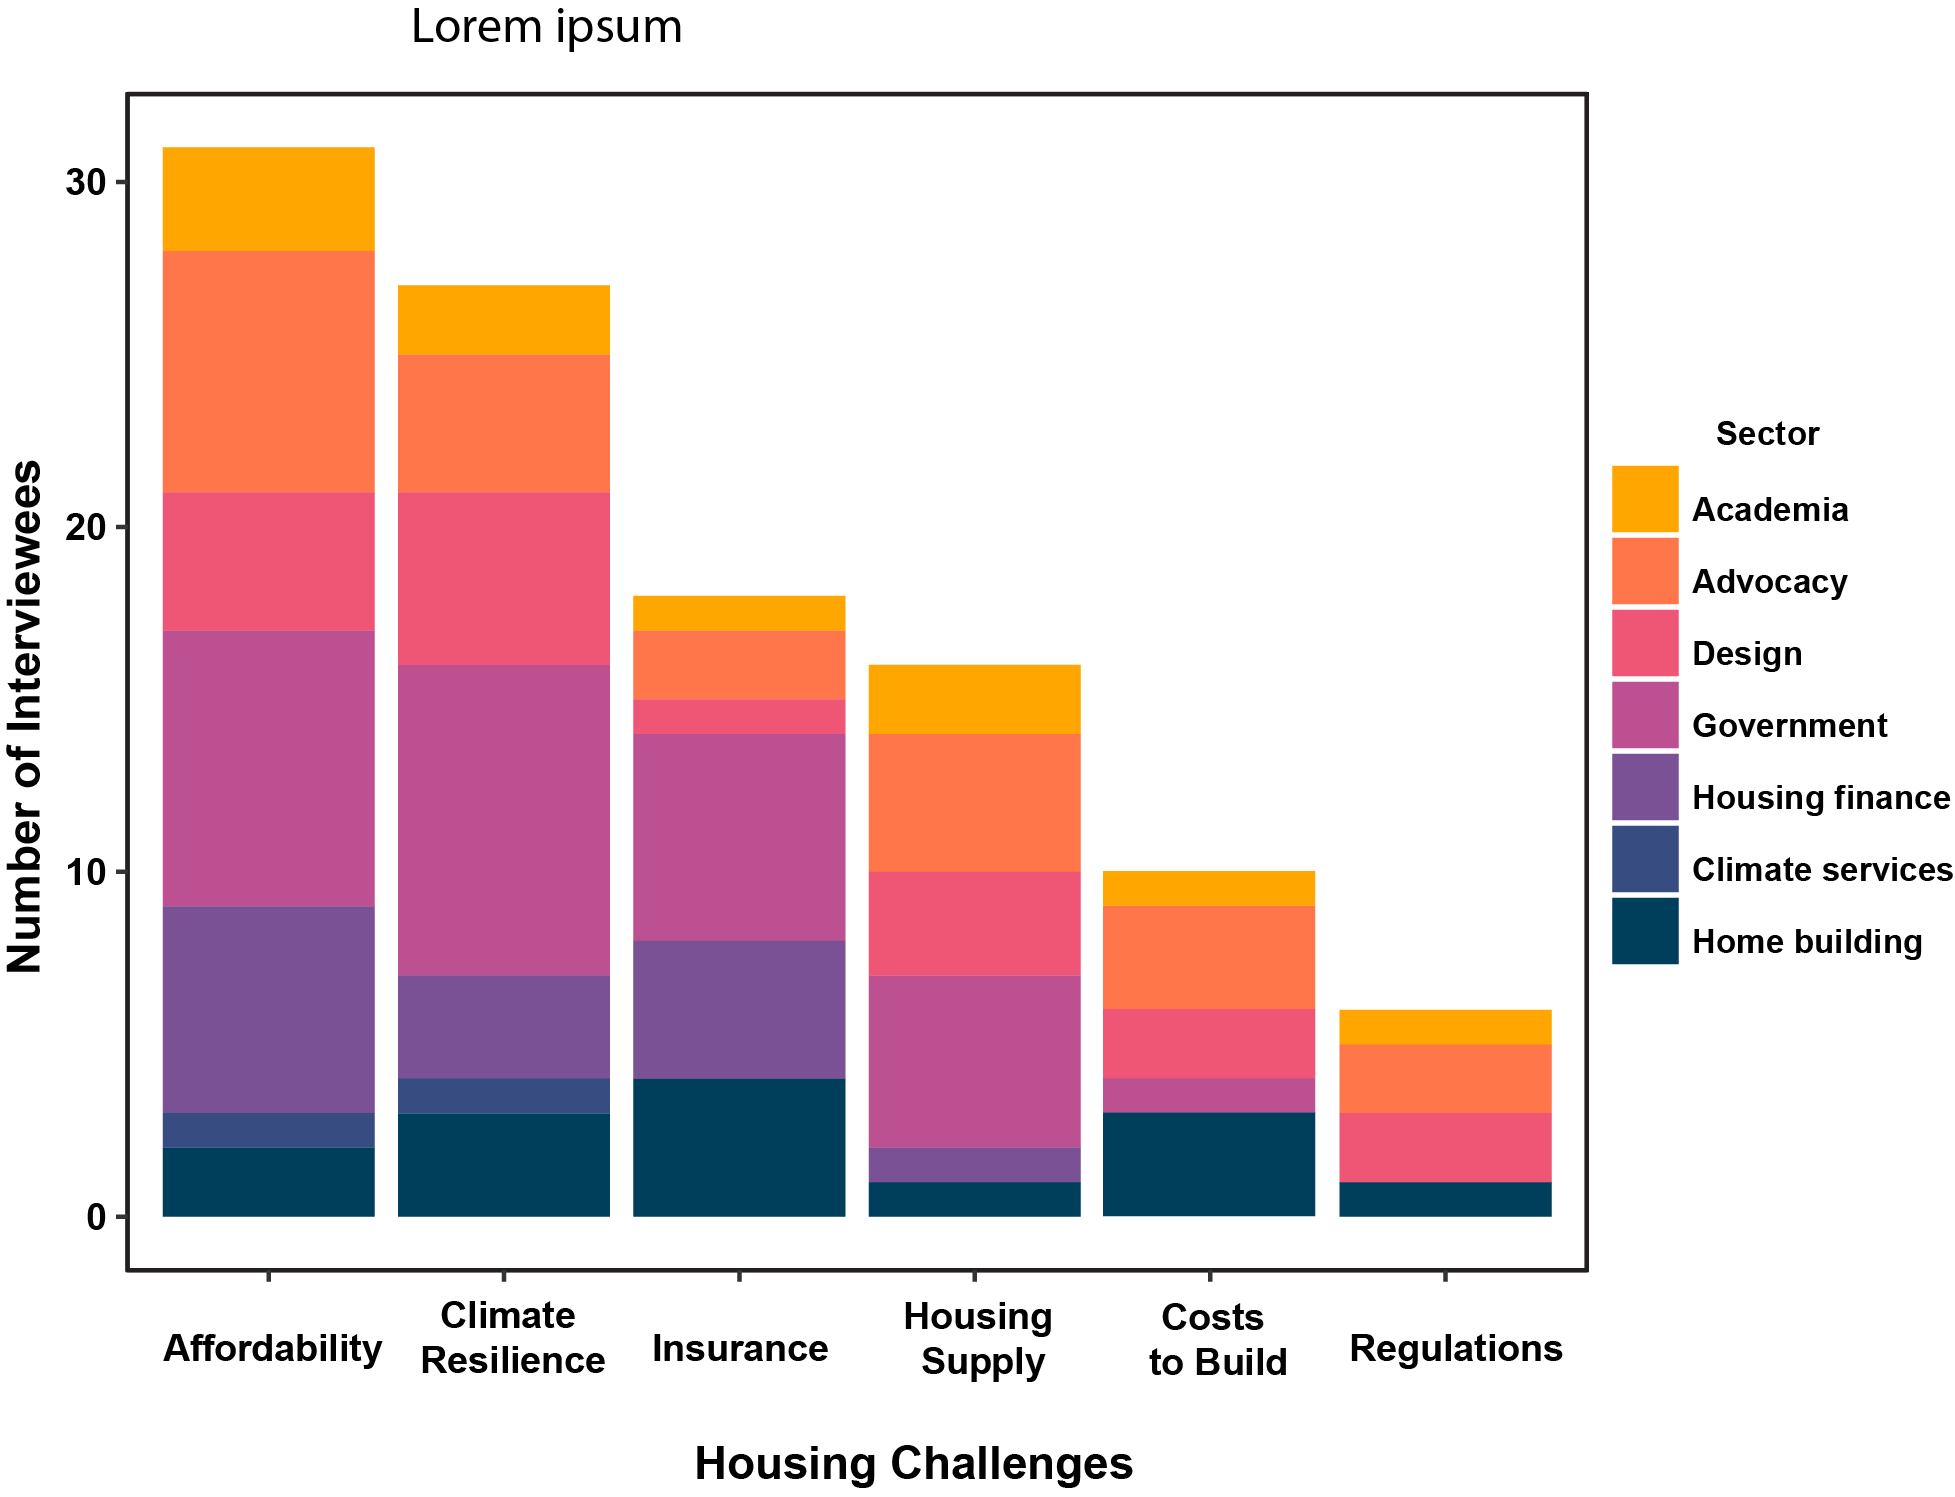


**SM 2.** A description of selected climate risk reduction actions and policies are provided below as examples of actions described by participants. Acronyms for actor categories are defined as federal (FG), state (SG), and local (LG) governments; mortgage finance (MF) and insurance (IN) agencies; real estate development and home construction (RC); climate risk information providers (CS); academia and think-tanks (AT); housing-related NGOs and advocacy groups (AN); and urban planning, engineering, and architecture firms (DN).

| **Policy Action or Program** | **Actor(s)** | **Solution**  **Type** |  | **Description** | **Barriers to Adoption/ Implementation** | **Enablers of Adoption** | **Policy**  **Stage** |
| --- | --- | --- | --- | --- | --- | --- | --- |
| **City of Boston Coastal Flood Resilience and Zoning Overlap District** | LG | Property-level risk reduction; increased freeboard |  | Zoning change requiring that multi-family construction within a new district, where 40 inches of sea-level rise (SLR) is expected by 2070, must implement 2 feet of freeboard above base flood elevation, determined by SLR model for the district. | N/A | Socio-political: political or organizational leadership | Implemented |
| **City of Charleston’s prohibition of “slab on grade” construction in floodplain** | LG, RC, AN | Property-level risk reduction |  | Created a slab on grade prohibition for residential buildings in the floodplain | Differences between stakeholders on how to develop resiliently | Socio-political: collaboration and consensus; political leadership; acknowledging urgency/ crisis.  Information: increasing information on awareness | Implemented |
| **City of Miami Beach Private Property Adaptation Program** | LG | Property-level risk reduction; funding source |  | Created a grant program in which a climate risk assessment is conducted on a property, and the city matches costs of resilience improvements up to $20,000, providing up to $40,000 in investments to help owners reduce property-level risks | Path dependance: lack of prior examples | Socio-political: acknowledging urgency/ crisis. Information: increasing information on awareness | Implemented |
| **New York City’s Executive Order No. 230 (Zoning Suspension for Flood Reconstruction)** | LG | Property-level risk reduction; elevation |  | Enacted an executive order to suspend height restrictions in neighborhoods affected by Hurricane Sandy to permit elevated homes |  | Socio-political: political or organizational leadership | Implemented |
| **State of California Department of Insurance Concept Note on Extreme Heat** | SG, IN | Financial solution; Reforms to insurance |  | Concept note detailing how local governments could purchase an insurance policy that would activate when certain temperature thresholds are met to release funds to reimburse for heat mitigation or resilience related costs. | Identifying funding sources; finding collaborators; path dependance: lack of prior examples | Socio-political: political or organizational leadership | Proposed; not implemented |
| **Parametric Insurance Pilot in New York City** | LG, AN, IN | Reforms to insurance |  | Pilot parametric insurance program providing qualifying households up to $15,000 following a major flood event to help communities recover more quickly. | Financial issues | Socio-political: political leadership; Financial enablers | Implemented, but completed without a qualifying event to trigger payouts |
| **Arup’s Flood REDi guide** | DN | Risk-reduction solution; new design guidelines and standards |  | REDi for Flood provides resilience-based design guidelines and planning strategies for building owners extending beyond building code requirements to protect buildings and recover functionality quickly after flood events | Data or information issues: data quality for decision-making; Path dependance: lack of prior examples | Socio-political: political or organizational leadership | Published online |
| **Enterprise Community Partner’s Resilience Academy** | AN, AT | Technical assistance/ financial solution |  | Established Climate Resilience Academies to provide support and guidance for assessing portfolio risk, building and retrofitting new and existing housing, understanding how to access funding and financing programs and incorporating community engagement and resilience strategies | Financial Issues: cost to builders and developers | Focusing on local needs, and utilizing local experts | Implemented |
| **State of Louisiana’s PRIME Program** | SG, AN | Property-level risk reduction; increased freeboard & prohibition of floodplain development; financial solution |  | Funds the creation of resilient multifamily project using Fortified standards; also prohibits developments within the 100-year floodplain and dictated that units in a 500-year floodplain must be at least three feet above natural ground | Path Dependance: lack of prior examples; Financial Issues: cost to builders and developers | Socio-political: acknowledging urgency/ crisis. Financial enablers: consumer behavior or demand | Implemented |
| **U.S. Federal Flood Risk Management Standard (FFRMS)** | FG | Property-level risk reduction; increased freeboard |  | Requires agencies to prepare for and protect federally funded buildings and projects from flood risks. FFRMS gives flexibility in selecting one of the three approaches for establishing the flood elevation | N/A | Financial: championed by federal agencies | Adopted by FEMA and HUD |

**SM 3. Reasons why (or not) legal mandates and/or laws are necessary to prompt action on climate risks.** Reasons interviewees stated for why they believe legal mandates/ laws are necessary or not, or were unsure, to prompt professionals or organizations within their sector to incorporate climate risks into their decision-making are shown below. Observed counts (*n*) and percents are provided for the number of interviews in which each theme or subtheme was recorded.

| ***Thematic codes*** | ***Illustrative quotes*** | ***Number of interviewees*** |
| --- | --- | --- |
| ***Yes, legal mandates are necessary*** | | **65.6%; *n*=42** |
| Voluntary codes/measures are not effective | “I don't see how we can rely on the sort of good faith participation of private actors who are selling the product. There's always going to be somebody who provides goods for cheaper and so you'll see markets run to the lowest level of regulation. And so, the only way to really ensure that we develop in proper patterns is to mandate that we do so through laws and regulations.” ***–*** *Advocacy Participant* | **25%; *n*=16** |
| Mandates necessary for awareness and standardization | “But you have to have a legal framework. I think part of that is just so that everybody is operating under the same requirement. That's the only way to get people to ultimately do anything.”**-** *Housing Finance Participant* | **15.6%; *n*=10** |
| Necessary to scale resilience | “Because there's no time, right? I mean, there’s not time on both on the mitigation and adaptation side if we want to slow any of these effects down…And there's still a long way to go.” ***–*** *Advocacy Participant* | **4.7%; *n*=3** |
| Necessary to prevent future bad decisions | “Yes. Without a legal mandate to do something…what’s functionally wrong is that you can build wherever you want, but then the taxpayer, the homeowner, or the property renters take on the risk of where that building was built and how it was badly built…and then on the back of the taxpayers, because we're bailing people out. If we all just sat there and said, ‘Does this flood insurance program work? Wouldn't it be better to define where we should allow buildings to be built?’”  ***-*** *Advocacy Participant* | **3.1%; *n*=2** |
| ***No, legal mandates/ laws are not necessary*** | | **7.8%; *n*=5** |
| Need to address misaligned incentives in current policies | “I don't think this is the first place that I’d go…because there are many existing frictions, policy distortions that we can potentially address.” ***–*** *Government Participant* | **4.7%; *n*=3** |
| ***Unsure*** | | **18.8%; *n*=12** |
| Balance between incentives and mandates | “Yes, and no, I think there's a balance... because I'm a strong believer that incentives are better than mandates. But there are certain things that you have to mandate, especially when someone doesn't do it.”  ***-*** *Design Participant* | **4.7%; *n*=3** |
| Laws could have unintended consequences | “They may be, but it will also cause a lot of professionals to leave the investment. For better or for worse, individual homeowners are committed to their assets in a way that others are not. And there is a real risk that at a time when, financing costs have gone up…unfunded mandates will cause people to just stop providing responsible homeownership rental options.” ***–*** *Home Building Participant* | **4.7%; *n*=3** |

**SM 4. Barriers to climate-resilient policy actions or strategies.** Barriers to action expressed by interviewees when describing climate risk reduction policies/actions they have taken or that prevent them from taking action. Illustrative quotes are provided for themes or subthemes. Observed counts (*n*) and percents are provided for the number of interviews in which each theme and subtheme was recorded.

| ***Thematic codes*** | ***Illustrative quotes*** | ***Number of interviewees*** |
| --- | --- | --- |
| ***Path dependence*** | | ***46.9%; n=30*** |
| Implementation challenges | “But it's very challenging, because I work for a regulator, so I can't cherry pick certain companies and say, ‘we're going to work with so and so on this project’. I have to kind of put the idea out there and then hope that there's someone who comes and takes it up and that they can matchmake with a local jurisdiction or an insurer. Like who is going to be the insured and who's going to be the insurer, I can't choose. Even though I have ideas of who might be the best. So once the concept exists, how do I effectuate it?”  -*Housing Finance Participant* | ***17.2%; n=11*** |
| Lack of long-term mindset | “Recently we were working to update one of our standards. We had a little bit of pushback from one of the cities who's concerned about what this means for redevelopment. And we've held our position saying that it's irresponsible to ignore this information while you facilitate redevelopment for the next 20 years that won't be viable in 50.”- *Government Participant* | ***9.4%; n=6*** |
| Lack of proactive mindset | “The public sector and elected officials are not praised for this. They prevent it from happening. You don't ever see a press release for ‘Hey, it could have been way worse. And I did this thing.’” -*Housing Finance Participant* | ***9.4%; n=6*** |
| Lack of prior examples | “I think the honestly the biggest challenge is that this hasn't been done before. And so, kind of building an entire program from scratch.”  ***-*** *Design Participant* | ***7.8%; n=5*** |
| ***Data or information issues*** | | ***45.3%; n=29*** |
| Data quality for decision-making | “I think what we've identified as the biggest issue is that there aren't good compound flood datasets that are available for local governments. And so, we're really at the point where we can’t make decisions.”- *Government Participant* | ***10.9%; n=7*** |
| Lack of education or awareness of risks | “One of the first ones is just convincing developers that you can't just build something for the next 50 years. You have to take the long view, and you have a vested interest in building something that's going to be sustained beyond that. So, we need to be smart today because there's a financial implication to that. And they are oftentimes very near-term oriented. I think that's one of the most difficult things.”***-*** *Design Participant* | ***9.4%; n=6*** |
| Scientific uncertainty | “The reason that we haven't gained confidence in a variety of climate risk analysis tools is that none of them have consistent results…we're actually part of the Prime Property Fund, which is managed by Morgan Stanley. So, they were able to do an evaluation of a bunch of different climate risk tools. All of them have different outputs… but we're still trying to figure out how to interpret it. But what was odd was [that] they had each of these modeling tools, say ‘Okay, what are the top 10 properties at risk?’ and it was very inconsistent, which kind of made us question all of them.”- *Home Building* *Participant* | ***9.4%; n=6*** |
| Information asymmetries | “And a part on the industry, the industry has a lot of capabilities that they don't necessarily share out. Organizations like First Street and others are building cool tools to make them available… RMS Moody's too.”***-*** *Housing Finance Participant* | ***4.7%; n=3*** |
| ***Financial Issues*** | | ***43.6%; n=28*** |
| Cost to builders and developers | “So, I think that in order to try to make budgets meet with those two pressures, and the insurance issue… I mean, there’s economic pressure on development too, because [there’s] not only builder’s risk of construction cost, but the operating cost means I have less net operating income, and consequently can borrow less money from a debt service coverage perspective. So, you are probably not sacrificing resiliency today. But you are sacrificing what you can do. In this particular project where we're sacrificing some aesthetics...We're revisiting it, given the two pressures that I mentioned. If I had a 28-unit project, so modestly small projects in a rural community today, I might consider wood. We own 2,100 units, maybe 25 properties. I have one wood frame structure in my portfolio. We might consider that today in North Florida. Whereas if I didn't have the interest rate and construction inflation issues, we would make the investments.” -*Home Building Participant* | ***20.3%; n=13*** |
| Lack of affordability to future residents | “I mean, we're a large public company. And so, there's always the discussion around those of us who are putting together the design versus those who are purchasing the design and meeting national criteria to quantify or reduce costs… costs became significantly higher and the market just wasn't able to bear the increase in costs. Sometimes costs were going up 30 to 50%. And, you know, buyers' jobs aren't changing that quickly.”- *Home Building Participant* | ***9.4%; n=6*** |
| ***Resilience design issues*** | | ***17.2%; n=11*** |
| Need new design guidelines or standards | “And in terms of the barriers to develop, it was really hard... The flood hazard component is actually pretty hard to define of like what flood level should be designed for. Basically, the industry is a little bit all over the place in terms of picking a base flood elevation, adding some arbitrary amount of freeboard, how to incorporate future precipitation into that? Do you do site specific flood modeling? If you do, is it like compound flood modeling, then it gets way more complicated. You're combining stormwater and riverine? It's close to the coast. Are you also doing a big hydrodynamic model that includes like coastal flooding? Does that then become too big of a requirement that people are just going to dismiss it and look up a FEMA map and then build the way they always have.”-*Design Participant* | ***9.4%; n=6*** |
| ***Labor issues***  “And then at the beginning, the big one was just like, nobody knew how to really build these [Passivehaus buildings], like everyone was kind of flying by the seat of their pants. You know, so there was a huge cost increase associated with it.”- *Design Participant* | | ***10.9%; n=7*** |
| ***Misaligned incentives***  “[Let’s] focus on the fact that we don't have the right incentives. And therefore, people continue to build in exposed areas. And yeah, the ultimate damage is going to be much higher than it would be if we had the right incentives. But the government has a hard time putting the right incentives in place, because it raises equity issues and to address the equity issues at the same time as you're trying to address the risk issues. And that's the essence of it. That's what makes it hard, and governments have not been good at addressing that. And if you want to where this has played out historically, all you have to do is look at federal flood insurance.”  - *Home Building* *Participant* | | ***10.9%; n=7*** |
| ***Regulatory issues*** | | ***18.8%; n=12*** |
| Creating new regulations to address resilience | “In this particular city…they actually have a code prohibiting you to raise your sea wall above a sort of level. So, we were being restricted by the current codes to actually become sea level ready. Now, it didn't really matter, but I think there's a lot of codes that are restrictive without them even realizing that they're preventing certain developers from actually protecting long term against sea level rise.”- *Home Building* *Participant* | ***17.2%; n=11*** |
| ***Social issues***  “Essentially, we're going to make it really, really easy to build housing in these places, but subject to certain exclusions, and that's where the environmental piece of that legislation comes in. There was a big debate for that this year because historically we had just said, ‘Okay, if it's in the coastal zone, and we remove it’. This doesn't apply in the coastal zone at all. And I think there was concern from some of our equity partners, who said, ‘Look, places like La Jolla or Coronado in San Diego, places like Monterey or Carmel, in the Central Coast, these are very high opportunity areas that are resilient to climate change and long term they have very mild climates. In fact, they're exactly the places we would want to build to be resilient in the long term. We should not unilaterally exclude those.’ So, we had a big conversation with environmental folks who had good faith concerns, who were like, ‘well, we don't want to put people in harm's way. There are also risks with coastal development.’ And we ended up sort of coming up with a new set of rules to say, ‘Okay, well, let's identify maybe it's not the entire coastal zone that we removed, but it's areas of actual high risk.’”- *Advocacy Participant* | | ***12.5%; n=8*** |

**SM 5.** **Enablers of climate-resilient policy actions or strategies.** Enablers of action expressed by interviewees when describing climate risk-reduction or resilience policies/actions they have taken. Illustrative quotes are provided for themes or subthemes. Observed counts (*n*) and percents are provided for the number of interviews in which each theme and subtheme was recorded.

| ***Thematic codes*** | ***Illustrative quotes*** | ***Number of interviewees*** |
| --- | --- | --- |
| ***Socio-political enablers*** | | ***42.2%; n=27*** |
| Collaborations and consensus building | “But the way that came about was we put together a group. It was like a working group basically of emergency response agencies in the state and us and insurers. So, it was California Office of Emergency Services and Office of Planning and Research and the California Public Utilities Commission, CalFire, Department of Insurance, and then I believe there was an insurance representative there as well, sort of walking through all of the different kinds of questions. Because you would have utilities’ concerns and you would have CalFire wanting to make sure that there's defensible space or where's the money going to come from for these hardening projects or the OPR would be focused on the land use and CEQA (California Environmental Quality Act)…and so all of those different voices came together to develop this framework, the Safer from Wildfire Framework. And then we took that framework as the basis for the regulation.” *Housing Finance Participant* | ***21.9%; n=14*** |
| Acknowledging urgency or crisis | “We had some 27,000 rental properties impacted by floods in 2016. So I guess the circumstance that enabled it was the broad recognition of the problem with developing in floodplain spent for renters.”- *Government Participant* | ***10.9%; n=7*** |
| Political or organizational leadership | “It was a very hierarchical government at that time. […] But [name removed] was actually a very effective administrator. The mandate went straight from [the] press conference to my boss, who was running the housing recovery office. And he came in like, ‘By the end of the year, we're going to get every family back into a house.’” - *Government Participant* | ***9.4%; n=6*** |
| ***Information*** | | ***18.6%; n=12*** |
| Increased information and climate risk awareness | “Because I think we can't be cautiously optimistic. About a development deal. We have to be certain that it is going to be the right investment. So, I think acknowledging that South Florida has more hurricane risk than they used to and has sea level rise and all of it…that was a process to allow us to move ahead. So, it's created some great conversations, and I think just made us think about our strategy a little bit differently and accept that there are real estate opportunities that are still very good in South Florida and our investors are still interested in that.”- *Home Building Participant* | ***14.1%; n=9*** |
| Proof of concepts | “So, we partner with a nonprofit in that community who builds homes, and we have them learn how to build to this higher standard. And then we bring the builders and 9 times out of 10, there's always one builder, and it takes them a serious minute to come around. But for most of the builders they will be in that living laboratory, right. So they will go ‘oh, well I'm already doing that’ and they'll be pointing out right because they're seeing the studs go up. They're seeing the foundation. They're like, ‘Oh, I'm already doing like that, that, that and that. And like oh really this is all I'm missing? Oh, I can do that.’ It’s very easy. But they have to see it before they will go ‘okay, I get it. I get it.’”-*Advocacy Participant* | ***4.7%; n=3*** |
| ***Financial enablers*** | | ***15.6%; n=10*** |
| Consumer behavior | “We see home prices for places that are in flood risk areas appreciate slower. So, we're seeing consumer action and behaviors saying, ‘I'm not going to prioritize these coastal homes just because they're on the water because I see climate risk in that’. In places with the same risks involved, where consumers in that area did not see climate change as a real threat, we saw those appreciating just as fast if not faster than homes that have less risk. And so, consumer sentiment I think is a huge piece of this.” -*Climate Services Participant* | ***9.4%; n=6*** |
| More funding; capital | “The challenge and the opportunity is not just ‘how do you fund it once through philanthropic funding, but how do you create a solution that can be funded over time?’ And I think we need to continue to learn, and I think the piece we need to learn about is we think micro insurance is important, but what is "micro" that might be different community to community. And how do you pay for that? Which is, do individuals pay for it? - *Advocacy Participant* | ***6.3%; n=4*** |
| ***Laws or legal mandates*** | | ***7.8%; n=5*** |
| Actual mandates | “You're the first person to ask if there's really any choice. And the truth is, there's little choice when it comes to impact windows, doors, structural strength in regards to certain winds, so I may be forced to meet 180 mile an hour wind storm in Dade County, a 200 mile an hour wind in Monroe County, the Florida Keys and I have no real choice. I mean, that's a regulatory requirement.”- *Home Building Participant* | ***6.3%; n=4*** |
| ***Standardization to increase access markets***  “There are a lot of slices of pie is the nice way to say it within the insurance industry. There are a number of intermediaries and to develop custom products requires even more overhead costs. So, the fact that there isn't an off-the-shelf product available that really has minimized the overhead costs and the cost of the intermediaries draws even more scrutiny from the stakeholders. But also, scrutiny from the buyers of the insurance themselves. So if there were in in a hypothetical future scenario, cafeteria style off-the-shelf menu that had a minimum number of intermediaries and therefore the costs were reduced quite significantly, and it was such a commonplace arrangement that it would be a no brainer to be able to sell upwards to folks who are not specialists in insurance, then there would absolutely be demand for it.”  – *Housing Finance Participant* | | ***4.7%; n=3*** |

**SM 6. Responsible actors and sectors for policy change.** Themes and subthemes emerging from interviewee responses regarding which actors or sectors have the most responsibility in enacting change that results in climate resilient solutions. Illustrative quotes are provided for themes and subthemes. Observed counts (*n*) and percents are provided for the number of interviews in which each theme and subtheme was recorded.

| ***Responsible Actor/Sectors*** | ***Illustrative quotes*** | ***Number of interviewees*** |
| --- | --- | --- |
| ***Federal government*** | “It falls on government, to put in place laws regulations, incentive structures that help that support the best decision making…the local governments are not going to have the capacity to do this themselves. So, I think it's really kind of a federal-state issue because they have the resources and the ability to. The federal government can fund it because it can provide funding more than anyone else can.” – *Advocacy Participant* | ***46.9%; n=30*** |
| ***FHFA/GSEs***  “The GSEs, because they're sitting on more exposure than any other entity in the country, on their mortgages, and they know it...How the hell do we scare people into action if they're not even being asked to pay anything for [it], is it real? I mean, how real is it? I mean, give me a break. Everyone tells me it's a crisis, but right now the only signalers are the insurance companies who are like, ‘enough is enough’, right?... If the GSEs started to do that, and anyone trying to get a federally backed mortgage had to have a conversation, a tough conversation about ‘Are we exposed? How long will this house be able to stand the way it is? What type of community is it? Have they taken the steps they need to?’ It's a totally different discussion. I think that's the American dream right out here. We're talking about the manifestation of the American Dream is your own house. When that's at risk, I think the American public will take it seriously.” *Design Participant* | ***14.1%; n=9*** |
| ***FEMA/NFIP***  *“*The FEMA official floodplain maps are used so much in government policies. Whoever is in charge of building those maps, whatever they do will have implications for the GSEs, for the National Flood Insurance Program, and therefore, implication for housing markets, mortgage markets, and then the general financial markets.” - *Government Participant* | ***7.8%; n=5*** |
| ***State government*** | “Every state has a state insurance office. They can steer the insurability of housing in accordance with these different factors to effectively guide people or naturally guide the market such that it will account for these different factors.”- *Advocacy Participant* | ***32.8%; n=21*** |
| ***Local government*** | “I would say it’s the local, municipal government, could be city, could be county, if it's unincorporated, that are responsible because they are basically saying we're going to take that risk, and we're going to assume the responsibility for providing an infrastructure to a specific property that may not exist in 10 years…but I don't want to blame local government. I want to be clear that local policy is often dictated by lobbyists from the development community that are telling people, there is minimal risk here. So, when I say local government, it’s not a civil servant. It's also the electeds are allowing the rules to exist.” – *Academia Participant* | ***37.5%; n=24*** |
| ***Everyone, “shared responsibility”*** | “My personal feeling is that the only way we're going to solve the problems and find solutions is through a joint effort. Federal government, state, local municipalities and developers. You can't put the burden on the developers because you're going to stop development. You can’t put the burden on the cities because they'll go broke. So, there's got to be some type of shared responsibility amongst everybody, and then [to] understand the impact of whatever decisions are made, so that those impacts can be paid for by somebody. And again, it can't just be the developer because there'll be no more development.” – *Home Building Participant* | ***14.1%; n=9*** |
| ***Home construction/***  ***real estate development*** | “Developers and contractors will certainly be key to making this easier and less expensive. And that part of this process is that our construction efforts will make the standards more common to contractors so that there's greater knowledge out there about how to do it, which will drive the cost down. But their participation in not trying to resist the change, because that's often where that's where a lot of innovative risk reduction measures kind of run into a brick wall is when contractors and developers push against them. And then typically, legislatures will listen to that voice.” - *Government Participant* | ***14.1%; n=9*** |
| ***Insurance*** | “It's the insurance market, which they just woke up to, like in the last 24 months, because the reality is if they price their insurance to truly cover the risks that they cover right now, no one will be able to afford that product and they will in essence, go away.” – *Advocacy Participant* | ***9.4%; n=6*** |
| ***Finance/***  ***Investors*** | “My experience has been that investors drive real action on climate change. So, any of the industry collaborative efforts, whether it be through REITs, or commercial real estate, with insights from the investment community and not just US investors. Beyond that, because a lot of real estate investors who drive this are not in the US, right…What I wish would help guide this would be some federal regulations around it. But there are so many challenges with being able to do that in a way that would be regionally appropriate…that would be challenging to do, as well as the implementation process would probably end up adding unintentional consequences that would not be positive on this… but I see so many challenges with there just being more regulations around it versus it coming from this is what is most valuable [to] the investment community and they're not going to buy your building in South Florida unless you've mitigated for these X, Y and Z risks.” – *Home Building Participant* | ***4.7%; n=3*** |
| ***Private sector, general*** | “I think each level has a unique role in that. But the government says, ‘here's how we're going to do things’ and then private sector response to that is, ‘we'll find a way to operate in that space’. So, I think that the role of the government is quite important in setting the ground rules for how things proceed. In practice, though, I think the private sector is probably much more important. That's where the money is, that's where people are making the real decisions that can transform many of our communities, and either give people access to mortgages or insurance or other financial tools that will drive behavior.”- *Government Participant* | ***4.7%; n=3*** |
| ***Credit ratings agencies*** | “The rating agencies, so Moody's, S&P, Fitch, would play a similar role in the commercial space and in some other areas of securitization. So, I think that those would be the ones I'd really highlight. The folks that can require and or encourage or incentivize data collection, which then helps inform decisions by all the other actors.”- *Advocacy Participant* | ***3.1%; n=2*** |
