# Supplementary material for: Challenges and opportunities in scaling climate-resilient housing solutions
Source: Research Square preprint supplement (doi:10.21203/rs.3.rs-6322825/v1), 2025-05-05
Supplement: Supplementary file 2 [file d2d412dbe8a88739afb6b739.docx]

**Appendix A**

Table listing primary interactions across sectors within each action type referred to in Figure 3.

| **Category** | **Start** | **End** | **Interaction** |
| --- | --- | --- | --- |
| Advocacy |  |  |  |
|  | AN | FG | Information, analysis, technical assistance, lobbying for solutions |
|  | AN | SG | Information, analysis, technical assistance, lobbying for solutions |
|  | AN | LG | Information, analysis, technical assistance, lobbying for solutions |
|  | AN | DN | Information, analysis, technical assistance, lobbying for solutions |
|  | AN | IN | Information, analysis, technical assistance, lobbying for solutions |
|  | AN | MF | Information, analysis, technical assistance, lobbying for solutions |
|  | AN | RC | Information, analysis, technical assistance, lobbying for solutions |
|  | CS | AN | Provides information that influences strategic action |
|  | CS | AT | Provides information that influences strategic action |
|  | AT | FG | Information, analysis, technical assistance, lobbying for solutions |
|  | AT | SG | Information, analysis, technical assistance, lobbying for solutions |
|  | AT | LG | Information, analysis, technical assistance, lobbying for solutions |
|  | AT | DN | Information, analysis, technical assistance, lobbying for solutions |
|  | AT | IN | Information, analysis, technical assistance, lobbying for solutions |
|  | AT | MF | Information, analysis, technical assistance, lobbying for solutions |
|  | AT | RC | Information, analysis, technical assistance, lobbying for solutions |
|  | AT | AN | Information, analysis, technical assistance, lobbying for solutions |
| Climate risk information |  |  |  |
|  | FG | SG | Provides climate data |
|  | FG | LG | Provides climate data |
|  | FG | DN | Provides climate data |
|  | FG | IN | Provides climate data |
|  | FG | MF | Provides climate data |
|  | FG | RC | Provides climate data |
|  | FG | AN | Provides climate data |
|  | FG | AT | Provides climate data |
|  | FG | CS | Provides climate data |
|  | CS | FG | Provides climate data |
|  | CS | SG | Provides climate data |
|  | CS | LG | Provides climate data |
|  | CS | DN | Provides climate data |
|  | CS | IN | Provides climate data |
|  | CS | MF | Provides climate data |
|  | CS | RC | Provides climate data |
|  | CS | AT | Provides climate data |
|  | CS | AN | Provides climate data |
|  | AT | FG | Provides information analysis |
|  | AT | SG | Provides information analysis |
|  | AT | LG | Provides information analysis |
|  | AT | DN | Provides information analysis |
|  | AT | IN | Provides information analysis |
|  | AT | MF | Provides information analysis |
|  | AT | RC | Provides information analysis |
|  | AT | AN | Provides information analysis |
|  | SG | LG | Provides climate data |
|  | SG | AN | Provides climate data |
|  | SG | MF | Provides climate data |
|  | SG | IN | Provides climate data |
|  | SG | RC | Provides climate data |
|  | SG | DN | Provides climate data |
|  | SG | CS | Provides climate data |
|  | LG | AN | Provides climate data |
|  | LG | MF | Provides climate data |
|  | LG | IN | Provides climate data |
|  | LG | RC | Provides climate data |
|  | LG | DN | Provides climate data |
|  | LG | CS | Provides climate data |
|  | DN | RC | Provides information analysis |
|  | DN | AN | Provides information analysis |
|  | DN | FG | Provides information analysis |
|  | DN | SG | Provides information analysis |
|  | DN | LG | Provides information analysis |
|  | AN | RC | Provides information analysis |
|  | AN | DN | Provides information analysis |
|  | AN | FG | Provides information analysis |
|  | AN | SG | Provides information analysis |
|  | AN | LG | Provides information analysis |
|  | AT | DN | Provides information, data, policy analysis to inform property level resilience |
| Financial Solutions |  |  |  |
|  | FG | SG | Provide funding for resilience through grants, disaster recovery, incentivize new solutions |
|  | FG | LG | Provide funding for resilience through grants, disaster recovery, incentivize new solutions |
|  | FG | DN | Provide funding for resilience through grants, disaster recovery, incentivize new solutions |
|  | FG | IN | Changes to NFIP; derisk insurance solutions |
|  | FG | MF | Direct GSEs to take action |
|  | FG | AN | Make directives that affordable housing people must consider |
|  | SG | LG | Provide funding for regional cooperation or resilience |
|  | SG | IN | Require insurance companies to take resilience into premiums consideration |
|  | SG | MF | State MF agencies can mandate resilience; create low interest loans for resilience |
|  | LG | IN | Partnerships and collaborations to build new insurance products |
|  | AT | IN | Help to develop new financial instruments and tools |
|  | AT | MF | Help to develop new financial instruments and tools |
|  | AT | SG | Help to develop new financial instruments and tools |
|  | AT | LG | Help to develop new financial instruments and tools |
|  | AT | AN | Help to develop new financial instruments and tools |
|  | AT | FG | Help to develop new financial instruments and tools |
|  | IN | RC | Could incentivize premium reduction |
|  | IN | AN | Could incentivize premium reduction |
|  | MF | RC | Could impose rules for construction |
|  | MF | AN | Could impose rules for construction |
|  | AN | MF | Work together to develop new financial products |
|  | AN | IN | Work together to develop new financial products |
| Land-use |  |  |  |
|  | FG | LG | Can incentivize zoning change; provide funding for resilience; disaster recovery |
|  | SG | LG | Regulatory framework; funding sources; building codes |
|  | LG | RC | Zoning and land use regulation |
|  | LG | AN | Zoning and land use regulation |
|  | LG | DN | Zoning and land use regulation |
|  | CS | LG | Provides information that influences land use decisions |
|  | CS | SG | Provides information that influences land use decisions |
|  | CS | FG | Provides information that influences land use decisions |
|  | AT | LG | Provides information that influences land use decisions |
|  | AT | SG | Provides information that influences land use decisions |
|  | AT | FG | Provides information that influences land use decisions |
| Property-level |  |  |  |
|  | FG | RC | Implementing regulatory frameworks; LIHTC;NFIP; GSEs |
|  | FG | DN | Source of funding; imposes resilience design mandates, regulatory frameworks |
|  | FG | AN | LIHTC for affordable housing; regulatory frameworks; funding sources; data information sources |
|  | FG | SG | Funding sources; regulatory frameworks; incentives for housing production |
|  | FG | LG | Funding sources; regulatory frameworks; incentives for housing production/ zoning change |
|  | FG | MF | Liquidity for mortgage markets through GSEs |
|  | FG | IN | NFIP; disaster recovery; regulatory frameworks; data sharing |
|  | SG | IN | regulates insurance operations |
|  | SG | DN | Sets building code |
|  | SG | RD | Sets building code |
|  | SG | AN | Sets building code |
|  | LG | RC | Sets building code; zoning and land-use regulations |
|  | LG | AN | Sets building code; zoning and land-use regulations |
|  | LG | DN | Sets building code; zoning and land-use regulations |
|  | AN | IN | Provides information, data, can help set building code or inform practice (IBHS, ICC) |
|  | AN | RC | Provides information, data, can help set building code or inform practice (IBHS, ICC) |
|  | AN | DN | Provides information, data, can help set building code or inform practice (IBHS, ICC) |
|  | CS | DN | Develops new resilience standards using information |
|  | CS | AN | Develops new resilience standards using information |
|  | CS | RC | Develops new resilience standards using information |
|  | AT | FG | Provides information, data, policy analysis to inform property level resilience |
|  | AT | SG | Provides information, data, policy analysis to inform property level resilience |
|  | AT | LG | Provides information, data, policy analysis to inform property level resilience |
|  | AT | AN | Provides information, data, policy analysis to inform property level resilience |
|  | AT | DN | Provides information, data, policy analysis to inform property level resilience |
| Reforms |  |  |  |
|  | FG | SG | Disaster recovery reforms; NFIP reforms; GSE reforms |
|  | FG | LG | Disaster recovery reforms; NFIP reforms; GSE reforms |
|  | FG | DN | Disaster recovery reforms; NFIP reforms; GSE reforms |
|  | FG | IN | Disaster recovery reforms; NFIP reforms; GSE reforms |
|  | FG | MF | Disaster recovery reforms; NFIP reforms; GSE reforms |
|  | FG | AN | Disaster recovery reforms; NFIP reforms; GSE reforms |
|  | SG | IN | Reforms to insurance offices; Building codes |
|  | SG | LG | Reforms to insurance offices; Building codes |
|  | SG | DN | Reforms to insurance offices; Building codes |
|  | SG | AN | Reforms to insurance offices; Building codes |
|  | SG | RC | Reforms to insurance offices; Building codes |
|  | LG | IN | Zoning / land use reforms |
|  | LG | RC | Zoning / land use reforms |
|  | LG | AN | Zoning / land use reforms |
|  | LG | DN | Zoning / land use reforms |
|  | MF | IN | Loss of mortgages in high-risk areas |
|  | MF | LG | Loss of mortgages in high-risk areas |
|  | IN | LG | Stop providing insurance/ reform incentives |
|  | IN | AN | Stop providing insurance/ reform incentives |
|  | IN | RC | Stop providing insurance/ reform incentives |

**Appendix B**

**Interview Protocol**

1. Please describe your role within your organization.
2. How long have you held this position? What career stage are you in? Early, mid, late—somewhere in between?
3. What percentage of your time do you spend on addressing housing-related issues in your work? Are there other issue areas that are a primary focus within your work?
4. What locations/regions within the U.S. are the focus of your work?
5. What type of housing (e.g., single family or multi-family) is the focus of your work?

**Housing/ Climate Change**

1. **In your judgment, what is the most pressing challenge facing the private housing markets in the U.S. today?**

- What solutions exist to address this challenge?
- What barriers exist in enacting such solutions?
- What factors might enable their adoption?
- Are you or your organization working on addressing this challenge?
- How do you see climate change interacting with this issue?

1. **Is your organization addressing any of the following impacts/ hazards:**

**Paste into chat**-

(1) increased flooding from rainfall

(2)coastal storms

(3) high-tides

(4) sea-level rise

(5) drought

(6) wildfire

(7) extreme heat

(8) other—please describe

(Define ***climate impacts/risks—the impacts or potential effects (risks) resulting from exposure to hazards related to climate change***)

- **If yes**, does your work primarily focus on adaptation (**define**: ***responding to the impacts of climate change***) or mitigation (**define**: ***work focused on reducing greenhouse gas emissions or decarbonization)*** within housing or both?
- **If not,** what sector or industry specific signals would indicate to you or your organization that climate impacts should be considered within your plans or operations?

1. Are there any **laws or legal mandates** that require you to consider any of the hazards or impacts that I just mentioned in your decision-making, planning, or operations in any of the states, counties, or regions that you work in?

- **If yes,** do you only **consider climate risks in your work is because it is legally required?**
  - - **If no**, what motivated the consideration of climate risks within your work?
- Do you feel that laws and legal mandates are necessary to prompt professionals and organizations within your sector to address climate risks in their work?

1. What **actions, if any, have you or your organization taken** to reduce the impacts of climate change within the housing market?
   1. How are you evaluating the effectiveness of this [**policy, strategy, approach**]?
   2. Were there **barriers** that you or your organization needed to overcome to adopt this [**policy, strategy, approach**]?
   3. What factors **enabled the adoption** of this [**policy, strategy, approach**]?
   4. Who is best served by this [**policy, strategy, approach**]? Who is least well served?
2. How would you describe your or your organization’s **role in addressing climate adaptation** within housing markets?
3. Which entities, institutions, or sectors within the housing policy ecosystem have the most responsibility in taking action to effectively reduce climate risks being passed onto residents?
4. If you had the opportunity to implement one [**policy, strategy, approach**] within your sector that would make **the most difference in reducing climate risks within the housing market**, what would you do?

- Why is this the most effective [**policy, strategy, approach**]?
- What barriers prevent this [**policy, strategy, approach**] from occurring now?
- What factors might enable the adoption of this [**policy, strategy, approach**]?

**[Migration]**

1. Do you think people are **broadly shifting their preferences and decisions to live in less-risky** areas or **desire to live in more resilient homes**, or not?
   1. **If yes**, how might these shifts in preferences and decisions influence your work or your organization’s approach to climate and housing?
   2. **If no, what are some indicators that preferences and decisions are not changing?**

**Conclusion:**

1. Are there questions or topics that I should have asked you that I did not?
2. Is there someone that is knowledgeable about the topics we discussed that you think I should speak to next? Is there someone who might offer an alternative perspective or an opinion contrary to yours that I should speak to?
